# Supplementary material for: Hydrogel dressings with intrinsic antibiofilm and antioxidative dual functionalities accelerate infected diabetic wound healing
Source: PubMed Central journal article supplement (PMC10830466; doi:10.1038/s41467-024-44968-y), 2024-02-01
Supplement: 41467_2024_44968_MOESM3_ESM.pdf [file 41467_2024_44968_MOESM3_ESM.pdf]

## **Description of Additional Supplementary Files**

**File Name:** Supplementary Movie 1

**Description:** Film Application on Mouse Wound.

**File Name:** Supplementary Movie 2

**Description:** Film Removal from Mouse Wound.

**File Name:** Supplementary Movie 3

**Description:** Fiber Application on Mouse Wound.

**File Name:** Supplementary Movie 4

**Description:** Fiber Removal from Mouse Wound.
